# Supplementary material
Source: publisher site journal article supplement (https://www.dovepress.com/article/443213)
Supplement: Supplementary file 1 [file get_supplementary_file.php]

# **Patient Acceptability and Preferences for Solid Oral Dosage Form Drug Product Attributes: A Scoping Review**

Brett Hauber<sup>1</sup>, Mark V Hand<sup>2</sup>, Bruno C Hancock<sup>3</sup>, Joseph Zarrella<sup>3</sup>, Ljiljana Harding<sup>4</sup>,  
Michaela Ogden-Barker<sup>5</sup>, Amy S Antipas<sup>3</sup>, Stephen J Watt<sup>1</sup>

<sup>1</sup>Pfizer Inc, New York, NY, USA; <sup>2</sup>Pfizer Ireland Pharmaceuticals, Ballinacorney,  
Ringaskiddy, Cork, Ireland; <sup>3</sup>Pfizer Inc, Groton, CT, USA;  
<sup>4</sup>Pfizer ApS, Ballerup, Denmark; <sup>5</sup>Pfizer Ltd, Sandwich, England, UK

## **Supplementary Material**

**Supplementary Table 1. Search Strategy**

| <b>Search #</b> | <b>Search terms</b>                                                                                                                                                                                                                                                              | <b>Records identified</b> |
|-----------------|----------------------------------------------------------------------------------------------------------------------------------------------------------------------------------------------------------------------------------------------------------------------------------|---------------------------|
| 1               | 'acceptability'/exp OR acceptability OR 'palatability'/exp OR palatability OR swallow* OR 'appearance'/exp OR appearance OR 'taste'/exp OR taste OR 'odor'/exp OR odor OR 'color'/exp OR color OR 'mouth feel' OR mouthfeel OR 'shape'/exp OR shape OR 'coating'/exp OR coating" | 1,214,316                 |
| 2               | tablet*:ti' OR 'solid oral' OR 'oral solid' OR 'solid dosage' OR 'tablet formulation' OR 'tablet'/exp OR 'drug capsule' OR 'oral formulation*' OR pill:ti OR pills:ti                                                                                                            | 86,573                    |
| 3               | #1 AND #2                                                                                                                                                                                                                                                                        | 9965                      |
| 4               | preference* OR acceptab* OR acceptance                                                                                                                                                                                                                                           | 668,561                   |
| 5               | #3 AND #4                                                                                                                                                                                                                                                                        | 1493                      |
| 6               | #5 AND (2013:py OR 2014:py OR 2015:py OR 2016:py OR 2017:py OR 2018:py OR 2019:py OR 2020:py OR 2021:py OR 2022:py OR 2023:py)                                                                                                                                                   | 944                       |
| 7               | preferenc*:ti OR acceptability:ti OR adherence:ti OR palatability:ti OR swallowability:ti OR oral:ti OR solid:ti OR excipient*:ti                                                                                                                                                | 508,476                   |
| 8               | #6 AND #7                                                                                                                                                                                                                                                                        | 311                       |
| 9               | #8 NOT ('animal experiment'/de OR 'animal model'/de OR 'animal tissue'/de OR dogs OR cats)                                                                                                                                                                                       | 301                       |

**Notes:** Embase search conducted on May 12, 2023.

**Supplementary Table 2. Search Term Keywords**

---

| <b>Drug Product</b>                                                                                                                                                                                                                                                                                        | <b>Preference AND</b>                                                                                                                                                 | <b>Oral solid AND</b>                                                                                                                  |
|------------------------------------------------------------------------------------------------------------------------------------------------------------------------------------------------------------------------------------------------------------------------------------------------------------|-----------------------------------------------------------------------------------------------------------------------------------------------------------------------|----------------------------------------------------------------------------------------------------------------------------------------|
| <ul style="list-style-type: none"><li>• Acceptability</li><li>• Appearance</li><li>• Coating<sup>1</sup></li><li>• Color/colour<sup>2</sup></li><li>• Feel</li><li>• Mouth feel</li><li>• Odor/odour</li><li>• Palatability</li><li>• Shape<sup>1</sup></li><li>• Swallowability</li><li>• Taste</li></ul> | <ul style="list-style-type: none"><li>• Drug AND shape</li><li>• Drug AND size</li><li>• Drug AND tablet</li><li>• Drug AND capsule</li><li>• AND excipient</li></ul> | <ul style="list-style-type: none"><li>• Acceptance</li><li>• Adherence</li><li>• Excipient<sup>3</sup></li><li>• Formulation</li></ul> |

---

**Supplementary Table 3.** Disease Classification Among Included Studies

| First author<br>(year study<br>published)       | Healthy | Life-threatening |              | Non-life-threatening |              |
|-------------------------------------------------|---------|------------------|--------------|----------------------|--------------|
|                                                 |         | Symptomatic      | Asymptomatic | Symptomatic          | Asymptomatic |
| n (%)                                           | 13 (68) | 9 (47)           | 0            | 10 (53)              | 2 (11)       |
| Almukainzi<br>(2021) <sup>4</sup>               | ✓       |                  |              |                      |              |
| Barenie<br>(2020) <sup>5</sup>                  |         | ✓                |              | ✓                    | ✓            |
| Bracken<br>(2020) <sup>6</sup>                  | ✓       | ✓                |              | ✓                    |              |
| Bracken<br>(2022) <sup>7</sup>                  | ✓       | ✓                |              | ✓                    |              |
| Fastø<br>(2019) <sup>8</sup>                    |         | ✓                |              | ✓                    |              |
| Goyanes<br>(2017) <sup>9</sup>                  | ✓       |                  |              |                      |              |
| Hofmanová<br>(2019) <sup>10</sup>               | ✓       |                  |              |                      |              |
| Hofmanová<br>(2020) <sup>11</sup>               | ✓       |                  |              |                      |              |
| Hummler<br>(2023) <sup>12</sup>                 | ✓       |                  |              |                      |              |
| Kabeya<br>(2021) <sup>13</sup>                  | ✓       | ✓                |              | ✓                    | ✓            |
| Kurczewska-<br>Michalak<br>(2020) <sup>14</sup> | ✓       |                  |              |                      |              |
| Liu<br>(2016) <sup>15</sup>                     |         | ✓                |              | ✓                    |              |
| MacKenzie-<br>Smith<br>(2018) <sup>16</sup>     |         |                  |              | ✓                    |              |
| Osborn<br>(2019) <sup>17</sup>                  |         | ✓                |              |                      |              |
| Ranmal<br>(2013) <sup>18</sup>                  | ✓       | ✓                |              | ✓                    |              |
| Shariff<br>(2020) <sup>19</sup>                 | ✓       |                  |              |                      |              |
| Vallet<br>(2020) <sup>20</sup>                  | ✓       |                  |              | ✓                    |              |
| Venables<br>(2015) <sup>21</sup>                |         | ✓                |              | ✓                    |              |
| Wargenau<br>(2022) <sup>22</sup>                | ✓       |                  |              |                      |              |

## References

1. US Food and Drug Administration. Size, shape, and other physical attributes of generic tablets and capsules. US Department of Health and Human Services; 2015. Available from: <https://www.fda.gov/media/87344/download>.
2. Overgaard A, Møller-Sonnergaard J, Christrup LL, Højsted J, Hansen R. Patients' evaluation of shape, size and colour of solid dosage forms. *Pharm World Sci*. 2001;23:185-188.
3. Veronica N, Heng PWS, Liew CV. Ensuring product stability—choosing the right excipients. *J Pharm Sci*. 2022;111(8):2158-2171.
4. Almukainzi M. Assessment of oral solid dosage forms administration manner and acceptability. *Pharmacia*. 2021;68(2):393-400.
5. Barenie RE, Kesselheim AS, Gagne JJ, et al. Preferences for and experiences with pill appearance changes: national surveys of patients and pharmacists. *Am J Manag Care*. 2020;26(8):340-347.
6. Bracken L, McDonough E, Ashleigh S, et al. Can children swallow tablets? Outcome data from a feasibility study to assess the acceptability of different-sized placebo tablets in children (creating acceptable tablets (CAT)). *BMJ Open*. 2020;10(10):e036508.
7. Bracken L, Habashy R, McDonough E, et al. Creating acceptable tablets 3D (CAT 3D): a feasibility study to evaluate the acceptability of 3D printed tablets in children and young people. *Pharmaceutics*. 2022;14(3):516.
8. Fastø MM, Genina N, Kaae S, Kälvemark Sporrøng S. Perceptions, preferences and acceptability of patient designed 3D printed medicine by polypharmacy patients: a pilot study. *Int J Clin Pharm*. 2019;41(5):1290-1298.

9. Goyanes A, Scarpa M, Kamlow M, Gaisford S, Basit AW, Orlu M. Patient acceptability of 3D printed medicines. *Int J Pharm.* 2017;530(1):71-78.
10. Hofmanová JK, Rajabi-Siahboomi A, Haque S, et al. Developing methodology to evaluate the oral sensory features of pharmaceutical tablet coatings. *Int J Pharm.* 2019;562:212-217.
11. Hofmanová JK, Mason J, Batchelor HK. Sensory aspects of acceptability of bitter-flavoured 7.5 mm film-coated tablets in adults, preschool and school children. *Int J Pharm.* 2020;585:119511.
12. Hummler H, Stillhart C, Meilicke L, et al. Impact of tablet size and shape on the swallowability in older adults. *Pharmaceutics.* 2023;15(4):1042.
13. Kabeya K, Satoh H, Hori S, Sawada Y. Experimental study on patient preferences regarding the shape and size of medical tablets and capsules using three-dimensionally printed plastic model formulations. *Patient Prefer Adherence.* 2021:863-870.
14. Kurczewska-Michalak M, Kardas P, Czajkowski M. Patients' preferences and willingness to pay for solid forms of oral medications—results of the discrete choice experiment in Polish outpatients. *Pharmaceutics.* 2020;12(3):236.
15. Liu F, Ghaffur A, Bains J, Hamdy S. Acceptability of oral solid medicines in older adults with and without dysphagia: a nested pilot validation questionnaire based observational study. *Int J Pharm.* 2016;512(2):374-381.
16. MacKenzie-Smith L, Marchi P, Thorne H, Timeus S, Young R, Le Calvé P. Patient preference and physician perceptions of patient preference for oral pharmaceutical formulations: results from a real-life survey. *Inflamm Intest Dis.* 2018;3(1):43-51.

17. Osborn ZF, Acosta TJP, Lee JC, McNicholl I, McKinnon JE. 2511. Characterization of patient pill preferences from a prospective placebo vs. placebo ease of swallowability study. *Open Forum Infect Dis.* 2019;6(Suppl 2):S871-S872.
18. Ranmal S, Tuleu C. Piloting the children's acceptability of oral formulations (CALF) medicines survey to determine perceptions and practices with paediatrics medicines. *Arch Dis Child.* 2013;98(6):e1-e1.
19. Shariff Z, Kirby D, Missaghi S, Rajabi-Siahboomi A, Maidment I. Patient-centric medicine design: key characteristics of oral solid dosage forms that improve adherence and acceptance in older people. *Pharmaceutics.* 2020;12(10):905.
20. Vallet T, Michelon H, Orlu M, et al. Acceptability in the older population: the importance of an appropriate tablet size. *Pharmaceutics.* 2020;12(8):746.
21. Venables R, Batchelor H, Hodson J, Stirling H, Marriott J. Determination of formulation factors that affect oral medicines acceptability in a domiciliary paediatric population. *Int J Pharm.* 2015;480(1):55-62.
22. Wargenau M, Reidemeister S, Klingmann I, Klingmann V. A composite endpoint for acceptability evaluation of oral drug formulations in the pediatric population. *Ther Innov Regul Sci.* 2022;56(6):903-909.
